# Supplementary material
Source: Springer Nature journal article supplement (https://www.springermedizin.de/resource/supplementary/12950_2012_255_MOESM7_ESM.doc/9558318)
Supplement: MOESM7 [file 9558318]

**Table 1** Selected genes involved in inflammation differentially regulated (FC ≥ 2) in THP-1 cells after dissolucytosis of gold compared to control THP-1 cells.

| **Fold change** | **Regulation** | **GeneSymbol** | **EntrezGene** |
| --- | --- | --- | --- |
|  |  |  |  |
| 2,1 | down | CLEC5A | 23601 |
| 2,7 | up | LAT | 27040 |
| 2,0 | down | VISA | 57506 |
| 2,0 | up | LTBR | 4055 |
| 4,2 | down | MYST3 | 7994 |
| 2,7 | down | CLEC4M | 10332 |
| 2,3 | down | IRF7 | 3665 |
| 3,0 | Down | FADS1 | 3992 |
| 2,1 | up | IFI27 | 3429 |
| 3,3 | up | CXCL12 | 6387 |
| 2,2 | up | CD86 | 942 |
| 2,5 | down | CCL26 | 10344 |
| 2,1 | up | OLR1 | 4973 |
| 2,5 | up | MS4A1 | 931 |
| 2,1 | up | CLEC7A | 64581 |
| 2,1 | up | CTSE | 1510 |
| 2,0 | down | IGHD | 3495 |
| 3,7 | up | INHBA | 3624 |
| 2,2 | up | TCF12 | 6938 |
| 4,4 | down | EGR1 | 1958 |
| 2,9 | up | CPLX2 | 10814 |
| 2,0 | down | FEZ2 | 9637 |
| 3,2 | up | FASLG | 356 |
| 3,3 | down | LTB | 4050 |
| 2,5 | up | HLA-DOA | 3111 |
| 2,1 | down | ETS1 | 2113 |
| 2,5 | up | CTSS | 1520 |
| 2,7 | up | IL1F8 | 27177 |
| 2,2 | down | IGSF6 | 10261 |
| 2,6 | up | HLA-C | 3107 |
| 2,6 | down | C1QB | 713 |
| 2,9 | up | CCRL1 | 51554 |
| 4,9 | down | BCL11A | 53335 |
| 2,5 | down | DOCK2 | 1794 |
